# Supplementary material for: Regulating the oxidation degree of nickel foam: a smart strategy to controllably synthesize active Ni3S2 nanorod/nanowire arrays for high-performance supercapacitors
Source: Royal Society of Chemistry journal article supplement (doi:10.1039/c6ta01547f), 2016-01-01
Supplement: c6ta01547f1.pdf [file c6ta01547f1.pdf]

## Electronic Supplementary Information (ESI)

### Regulating the oxidation degree of nickel foam: A smart strategy to controllably synthesize active Ni<sub>3</sub>S<sub>2</sub> nanorod/nanowire arrays for high-performance supercapacitors

Tingting Li<sup>†</sup>, Yunpeng Zuo<sup>†</sup>, Xiaomin Lei, Na Li, Jiawei Liu and Heyou Han\*

*State Key Laboratory of Agricultural Microbiology, College of Science, Huazhong Agricultural University, 1 Shizishan Street, Wuhan 430070, PR China*

*<sup>†</sup>These authors contributed equally to this work.*

\*Corresponding author. Tel: +86-27-87288505; Fax: +86-27-87288505

E-mail: [hyhan@mail.hzau.edu.cn](mailto:hyhan@mail.hzau.edu.cn)

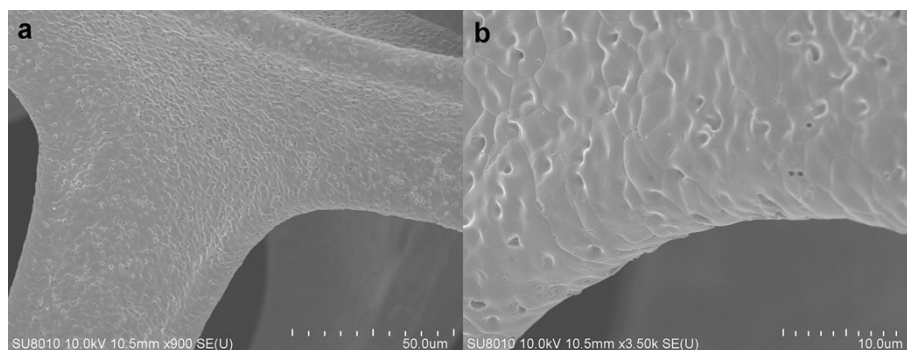

**Fig. S1** SEM images of pure NF at different magnifications.

---

\*To whom correspondence should be addressed. Fax: +86-27-87288505; Tel: +86-27-87288505; E-mail: [hyhan@mail.hzau.edu.cn](mailto:hyhan@mail.hzau.edu.cn).

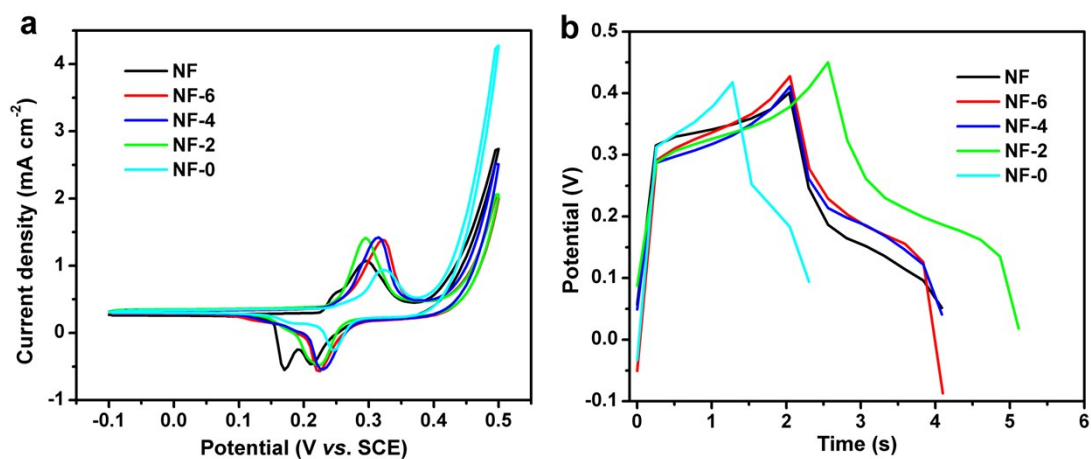

**Fig. S2** Electrochemical performances of NF, NF-6, NF-4, NF-2 and NF-0 electrodes. (a) CV curves at a scan rate of  $5 \text{ mV s}^{-1}$ . (b) GCD curves at a current density of  $5 \text{ mA cm}^{-2}$ .

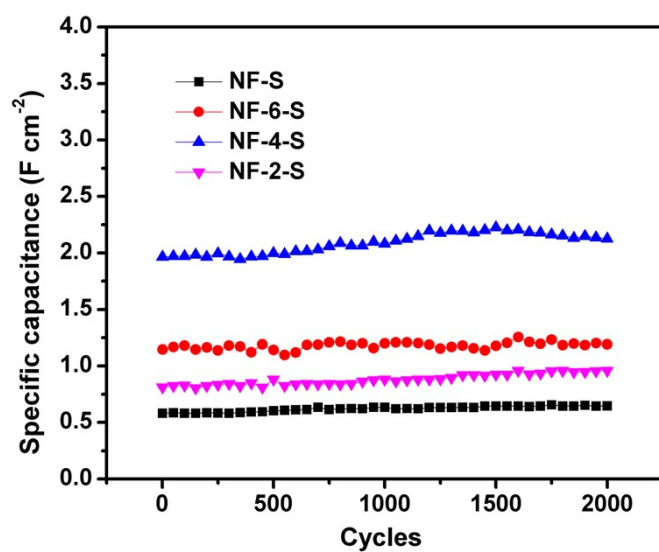

**Fig. S3** Cycling performance of NF-S, NF-6-S, NF-4-S and NF-2-S electrodes at a current density of  $20 \text{ mA cm}^{-2}$ .

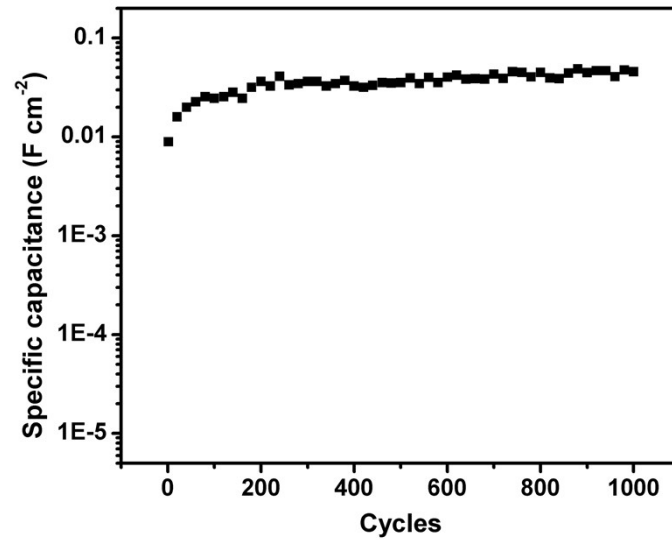

**Fig. S4** Cycling performance of NF electrode at a current density of 5 mA cm<sup>-2</sup>.

**Table S1** Comparison of electrochemical performance of different electrode materials

| Electrode materials                                                                              | Capacitance                                                                         | Rate capability                                 | Capacitance retention after cycling                                     | Reference |
|--------------------------------------------------------------------------------------------------|-------------------------------------------------------------------------------------|-------------------------------------------------|-------------------------------------------------------------------------|-----------|
| NF-4-S                                                                                           | 4.52 F cm <sup>-2</sup><br>(1051 F g <sup>-1</sup> ) at<br>1.25 mA cm <sup>-2</sup> | 53% from 2.5 to<br>30 mA cm <sup>-2</sup>       | 108.3% after<br>2000<br>cycles at 20 mA<br>cm <sup>-2</sup>             | This work |
| NiCo <sub>2</sub> S <sub>4</sub><br>nanotubes@<br>NiCo <sub>2</sub> S <sub>4</sub><br>nanosheets | 1948 mF cm <sup>-2</sup><br>at 1.0 mA cm <sup>-2</sup>                              | 79% from 1.0 to<br>20 mA cm <sup>-2</sup>       | 94% after 5000<br>cycles at 2 mA<br>cm <sup>-2</sup>                    | Ref. 54   |
| Flaky Ni <sub>3</sub> S <sub>2</sub>                                                             | 717 F g <sup>-1</sup> at 2 A<br>g <sup>-1</sup>                                     | 57.3% from 2<br>to 32 A g <sup>-1</sup>         | 62% after 1000<br>cycles at 4 A g <sup>-1</sup>                         | Ref. 52   |
| NiCo <sub>2</sub> S <sub>4</sub> /CFP                                                            | 1.19 F cm <sup>-2</sup> at<br>1.0 mA cm <sup>-2</sup>                               | 70.0% from 1.0<br>to 25 mA cm <sup>-2</sup>     | 75.9% after 5000<br>cycles at 20 mA<br>cm <sup>-2</sup>                 | Ref. 55   |
| CNT@Ni <sub>3</sub> S <sub>2</sub><br>hybrid                                                     | 514 F g <sup>-1</sup> at 4 A<br>g <sup>-1</sup>                                     | 70.4% from 4<br>to 13.3 A g <sup>-1</sup>       | 88% after 1200<br>cycles at 5.3 A<br>g <sup>-1</sup>                    | Ref. 22   |
| NiCo <sub>2</sub> S <sub>4</sub><br>porous<br>nanotubes                                          | 1093 F g <sup>-1</sup> at<br>0.2 A g <sup>-1</sup>                                  | 85.4% from 0.2<br>to 1.0 A g <sup>-1</sup>      | 63% after 1000<br>cycles at 1.0 A<br>g <sup>-1</sup>                    | Ref. 56   |
| Ni <sub>3</sub> S <sub>2</sub> dendrites                                                         | 710.4 F g <sup>-1</sup> at<br>2.0 A g <sup>-1</sup>                                 | 66.2% from 2.0<br>to 14 A g <sup>-1</sup>       | No capacitance<br>loss after 2000<br>cycles at 5.0 A<br>g <sup>-1</sup> | Ref. 32   |
| Ni <sub>3</sub> S <sub>2</sub><br>nanoflakes                                                     | 0.387 F cm <sup>-2</sup> at<br>10 mA cm <sup>-2</sup>                               | 70.9% from 1.0<br>to<br>10 mA cm <sup>-2</sup>  | 77.2% after 5000<br>cycles at 10.0 mA<br>cm <sup>-2</sup>               | Ref. 23   |
| NiS nanosheets                                                                                   | 2.64 F cm <sup>-2</sup><br>(527 F g <sup>-1</sup> ) at<br>2.5 mA cm <sup>-2</sup>   | 56.4% from 2.5<br>to<br>100 mA cm <sup>-2</sup> | 90% after 2000<br>cycles at 10 mA<br>cm <sup>-2</sup>                   | Ref. 53   |

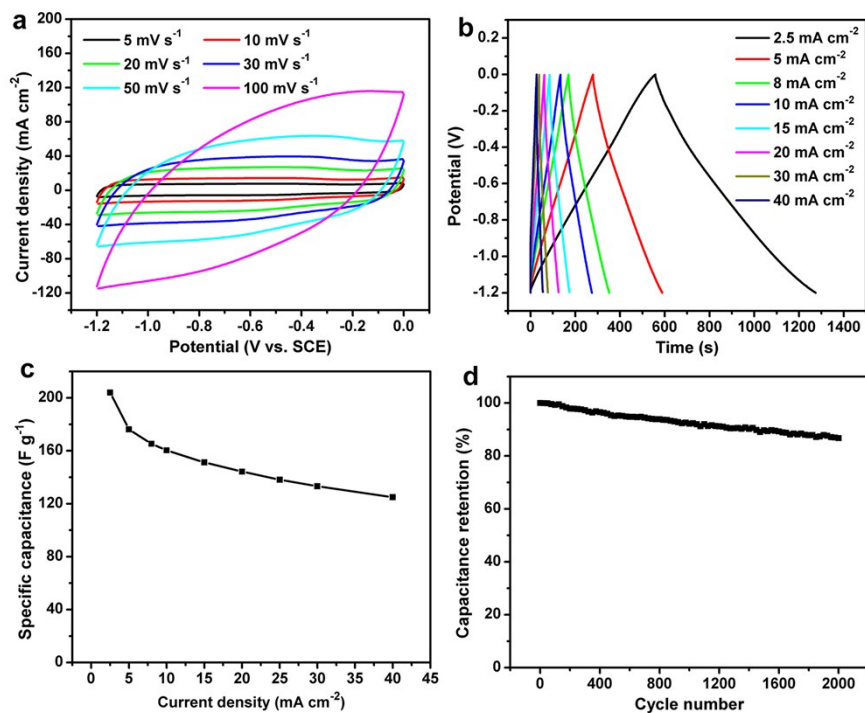

**Fig. S5** (a) CV curves of NPGC electrode at different scan rates in 3 M KOH. (b) GCD curves of NPGC electrode at different current densities. (c) Specific capacitance of the NPGC electrode at various current densities. (d) Cycle performance of the NPGC electrode at a current density of 30 mA cm<sup>-2</sup>.

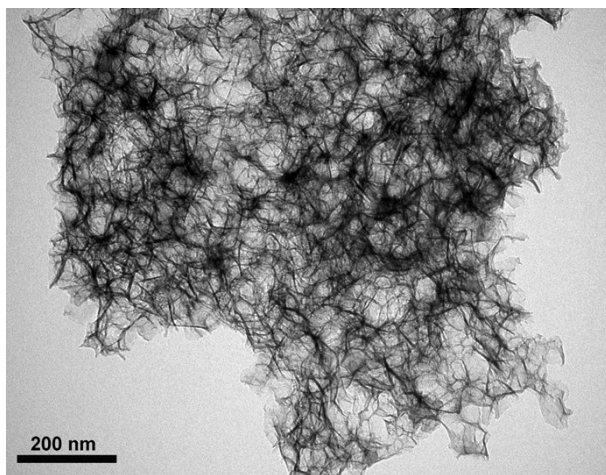

**Fig. S6** TEM image of NPGC.

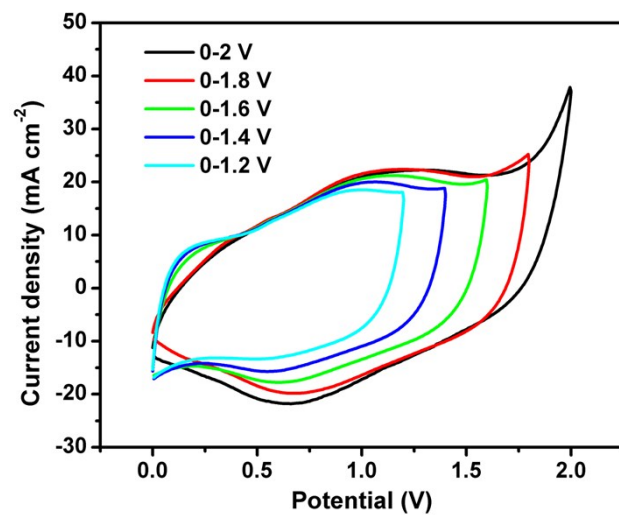

**Fig. S7** CV curves of NF-4-S//NPGC asymmetric supercapacitor at scan rate of 20  $\text{mV s}^{-1}$  with different scan voltage windows in 3 M KOH electrolyte.
